# Supplementary material for: Structural insights into a novel anticancer sulfonamide chalcone
Source: Royal Society of Chemistry journal article supplement (doi:10.1039/c7nj03523c), 2018-01-01
Supplement: c7nj03523c2.xlsx [file c7nj03523c2.xlsx]

## Sheet: Consenso
Known Chalcone Targets in ChEMBL				PharmMapper predictions				Protein Data Bank		Docking
Target (organism)	SMILES	Activity data	Reference	Target (organism)	Fit Score	Normalized Fit Score	Pharmacophore	PDB ID	Resolution	Grid Dimensions (x, y, z)	Box volume (Å3)	Score FRED	Score Hybrid	Consensus Score
Retinoic acid receptor beta (Mus musculus)	Cc1ccc(cc1)C2=CCC(C)(C)c3cc(ccc23)C(=O)\C=C\c4ccc(cc4)C(=O)O	IC50 = 0.40 µM	Álvarez et al. Bioorg Med Chem. 2009;17: 4345–4359.	Retinoic acid receptor beta (Homo sapiens)	3.863	0.4292		4DM6	1.9	16.24 x 19.73 x 23.13	7413	-17.78	-17.12	-17.45
Retinoic acid receptor alpha (Mus musculus)	Cc1ccc(cc1)C2=CCC(C)(C)c3cc(ccc23)C(=O)\C=C\c4ccc(cc4)C(=O)O	IC50 < 0.30 µM	Álvarez et al. Bioorg Med Chem. 2009;17: 4345–4359.	Retinoic acid receptor alpha (Homo sapiens)	3.681	0.5258		3A9E	2.75	25.27 x 15.68 x 18.93	7499	-16.459	-15.698	-16.0785
Aldose reductase (Homo sapiens)	Oc1ccc(\C=C\C(=O)c2ccc(O)cc2O)cc1	IC50 = 0.32 µM	Naeem et al. Bioorg Med Chem. 2012;20: 1251–1258.	Aldose reductase (Homo sapiens)	2.85	0.9499		1US0	0.66	18.32 x 19.12 x 23.06	8077	-13.671	-10.332	-12.0015
Dihydrofolate reductase (Homo sapiens)	CC1(C)N=C(N)N=C(N)N1c2cccc(c2)C(=O)\C=C\c3ccccc3	IC50 = 2.40 µM	Ng et al. Eur J Med Chem. 2016;115: 63–74.	Dihydrofolate reductase (Homo sapiens)	3.457	0.4321		1KMV	1.05	25.17 x 14.67 x 20.33	7505	-13.197	-9.927	-11.562
Phosphodiesterase 4 (Homo sapiens)	COc1ccc(\C=C\C(=O)c2c(OCc3ccccc3)cc(OC)c(OC)c2OC)cc1OC	IC50 = 2.30 µM	Nam et al. Bioorg Med Chem Lett. 2012;22: 3983–3987.	Phosphodiesterase 4D (Homo sapiens)	4.887	0.4887		1Y2K	1.36	16.88 x 16.63 x 22.45	6302	-11.642	-11.303	-11.4725
Bcr/Abl fusion protein (Homo sapiens)	OCCN1CCN(CC1)C(=O)c2ccc(cc2)C(=O)\C(=C/c3ccc(F)c(c3)[N+](=O)[O-])\SCc4ccc(F)cc4	IC50 = 0.50 µM	Reddy et al. Bioorg Med Chem. 2010;18: 2317–2326.	Bcr/Abl fusion protein (Homo sapiens)	3.866	0.4296		2HYY	2.4	26.97 x 22.13 x 18.65	11131	-12.918	-9.275	-11.0965
Dihydroorotate dehydrogenase (Homo sapiens)	OC(=O)c1cc(\C=C\C(=O)c2ccc(Cl)cc2)ccc1O	IC50 = 6.06 µM	Diao et al. J Med Chem. 2012;55: 8341–8349.	Dihydroorotate dehydrogenase (Homo sapiens)	3.486	0.581		4OQV	1.23	19.69 x 20.65 x 17.95	7297	-12.888	-8.807	-10.8475
Histone deacetylase (Homo sapiens)	CN1CCN(Cc2ccc(cc2)C(=O)\C=C\c3cccc(\C=C\C(=O)NO)c3)CC1	IC50 = 0.02 µM	Thaler et al. J Med Chem. 2010;53: 822–839.	Histone deacetylase 8 (Homo sapiens)	3.612	0.6019		5BWZ	1.59	18.81 x 21.71 x 16.26	5579	-12.459	-8.799	-10.629
MAP kinase-activated protein kinase 5 (Homo sapiens)	CC(=O)c1c(O)c(C)c(O)c(Cc2c(O)c3C=CC(C)(C)Oc3c(C(=O)\C=C\c4ccccc4)c2O)c1O	IC50 = 1.90 µM	Davies et al Biochem J. 2000;351: 95–105.	MAP kinase ERK2 (Homo sapiens)	2.95	0.9833		2OJG	2	24.26 x 15.40 x 15.60	5830	-10.412	-10.204	-10.308
Beta-secretase 1 (Homo sapiens)	Oc1ccc(C(=O)\C=C\c2cccc(O)c2O)c(O)c1	IC50 = 0.27 µM	Anand P, Singh B. Med Chem Res. 2013;22: 3061–3075.	Beta-secretase 1 (Homo sapiens)	4.819	0.5355		5UYU	1.9	20.67 x 17.67 x 22.67	8275	-11.732	-9.598	-9.598
Vascular endothelial growth factor receptor 2 (Homo sapiens)	Oc1ccc(\C=C/2\Oc3ccccc3C2=O)cc1O	IC50 = 5.96 µM	Xie et al. Eur J Med Chem. 2015;89: 310–319.	Vascular endothelial growth factor receptor 2 (Homo sapiens)	4.259	0.6084		2XIR	1.25	28.27 x 19.35 x 18.23	9972	-9.854	-8.969	-9.4115
3-phosphoinositide dependent protein kinase-1 (Homo sapiens)	COc1cc(O)c(CC=C(C)C)c(O)c1C(=O)\C=C\c2ccc(O)cc2	IC50 = 6.60 µM	Lauro et al. Bioorg Med Chem. 2012;20: 3596–3602.	3-phosphoinositide dependent protein kinase-1 (Homo sapiens)	4.318	0.4797		3NAX	2.15	17.09 x 21.78 x 21.18	7883	-10.284	-8.403	-9.3435
Fibroblast growth factor receptor (Homo sapiens)	COC(=O)C1=C(c2ccccc2)c3ccccc3C1=O	IC50 = 5.10 µM	Barvian et al. Bioorg Med Chem Lett. 1997;7: 2903–2908.	Fibroblast growth factor receptor 2 (Homo sapiens)	3.695	0.739		3RI1	2.1	20.19 x 14.91 x 21.32	6416	-9.846	-8.737	-9.2915
Angiotensin-converting enzyme (Oryctolagus cuniculus)	Oc1ccc(C(=O)\C=C\c2ccc(O)c(O)c2)c(O)c1	IC50 = 0.73 µM	Bonesi et al. Bioorg Med Chem Lett. 2010;20: 1990–1993.	Angiotensin-converting enzyme (Homo sapiens)	3.504	0.5006		1UZE	1.82	16.26 x 16.80 x 23.39	6387	-9.486	-8.467	-8.9765
Phosphodiesterase 5A (Rattus norvegicus)	COc1cc(O)c(C[C@@H](CC=C(C)C)C(=C)C)c(O)c1C(=O)\C=C\c2ccc(O)cc2O	IC50 = 0.64 µM	Shin et al. Bioorg Med Chem Lett. 2002;12: 2313–2316.	Phosphodiesterase 5A (Homo sapiens)	2.954	0.9847		1TBF	1.3	23.65 x 17.81 x 19.03	8011	-11.109	-6.698	-8.9035
Cyclin-dependent kinase 2 (Homo sapiens)	CN1CCC(CC1)c2c(O)cc(O)c3C(=O)\C(=C\c4ccc(cc4)S(=O)(=O)N)\Oc23	IC50 = 0.03 µM	Schoepfer et al. J Med Chem. 2002;45: 1741–1747.	Cyclin-dependent kinase 2 (Homo sapiens)	4.615	0.7692		2R3I	1.28	17.22 x 20.46 x 19.13	6740	-9.431	-8.366	-8.8985
Nitric oxide synthase, inducible (Mus musculus)	COc1ccc(\C=C\C(=O)c2cc(C(=O)\C=C\c3ccc(OC)c(OC)c3)c(O)cc2O)cc1OC	IC50 = 0.95 µM	Vijaya et al. Eur J Med Chem. 2012;47: 97–103.	Nitric oxide synthase (Homo sapiens)	2.706	0.6765		1M9M	1.96	18.67 x 18.33 x 17.00	5817	-10.224	-7.052	-8.638
Tyrosine-protein kinase LCK (Homo sapiens)	Nc1ccc2C(=O)\C(=C/c3cc(Br)c(O)c(Br)c3)\C(=O)c2c1	IC50 = 0.03 µM	Bullington et al. Bioorg Med Chem Lett. 1998;8: 2489–2494.	Tyrosine-protein kinase LCK (Homo sapiens)	3.915	0.3915		3MPM	1.95	24.18 x 19.23 x 15.69	7297	-8.873	-7.893	-8.383
Cathepsin L (Homo sapiens)	[O-][N+](=O)c1ccc(cc1)C(=O)\C=C\c2ccc(cc2)N3CCCC3	IC50 = 9.42 µM	Kim et al. Bioorg Med Chem Lett. 2013;23: 3320–3324.	Cathepsin L (Homo sapiens)	4.173	0.4173		2XU3	0.9	19.83 x 20.67 x 22.00	9017	-6.741	-6.231	-6.486
Cathepsin B (Homo sapiens)	Oc1ccc(cc1)C(=O)\C=C\c2ccc(cc2)N3CCCC3	IC50 = 1.81 µM	Kim et al. Bioorg Med Chem Lett. 2013;23: 3320–3324.	Cathepsin B (Homo sapiens)	4.229	0.4699		3AI8	2.11	19.67 x 25.67 x 18.33	9254	-5.473	-4.071	-4.772
Tyrosine-protein kinase SYK (Homo sapiens)	Oc1ccc(cc1)C2=CC(=O)c3c(O)cc(O)cc3O2	IC50 = 4.20 µM	Singh et al. J Med Chem. 2012;55: 3614–3643.	Tyrosine-protein kinase SYK (Homo sapiens)	3.153	0.6307		1XBB	1.57	22.14 x 21.12 x 18.50	8649	-5.718	-2.508	-4.113
Cyclooxygenase-2 (Homo sapiens)	CC1(C)OC(=O)C(=C1c2ccc(cc2)S(=O)(=O)C)C(=O)c3ccccc3	IC50 = 0.60 µM	Li et al. Bioorg Med Chem Lett. 1999;9: 3181–3186.	Cyclooxygenase 2 (Homo sapiens)	3.789	0.5414		5KIR	2.7	17.16 x 17.00 x 22.83	6857	-3.342	-1.962	-2.652
